# Supplementary material for: ScatLay: utilizing transcriptome-wide noise for identifying and visualizing differentially expressed genes
Source: PubMed Central journal article supplement (PMC7566603; doi:10.1038/s41598-020-74564-1), 2020-10-15
Supplement: 41598_2020_74564_MOESM1_ESM.pdf [file 41598_2020_74564_MOESM1_ESM.pdf]

## Supplementary Figures and Tables

### ScatLay: Utilizing Transcriptome-wide Noise for Identifying and Visualizing Differentially Expressed Genes

Thuy Tien Bui<sup>1</sup>, Daniel Lee<sup>2</sup>, and Kumar Selvarajoo<sup>1,3,\*</sup>

<sup>1</sup>Singapore Institute for Food and Biotechnology Innovation, Agency for Science, Technology & Research (A\*STAR), 61 Biopolis Drive, Singapore 138673.

<sup>2</sup>School of Computer Science and Engineering, Nanyang Technological University, 50 Nanyang Avenue, Singapore 639798.

<sup>3</sup>Synthetic Biology for Clinical and Technological Innovation (SynCTI), National University of Singapore, 28 Medical Drive, Singapore 117456

\*Corresponding author email: [kumar\\_selvarajoo@sifbi.a-star.edu.sg](mailto:kumar_selvarajoo@sifbi.a-star.edu.sg)

#### Supplemental figure legend

**Figure S1: Comparing transcriptome-wide data with statistical distributions.** Cumulative distribution functions and Quantile-quantile plot in *E. coli* (**a** and **b**), *S. cerevisiae* (**c** and **d**), and mouse ESC (**e** and **f**), between transcriptome data (black colour) and lognormal (red), Pareto (light green), Burr (cyan), log-logistic (blue), Weibull (purple), and gamma (grey) statistical distributions at  $t = 0, 0.5, 1, 2, 5, 10$  minute for *E. coli*,  $t = 0, 5, 10, 30, 60, 120, 180, 240$  minute for *S. cerevisiae*, and conditions (wild type, Mof KO, Control, ETO treated, ETO released) for mouse ESC. Genes with expression level above TPM = 5 for *E. coli* and TPM = 2 for *S. cerevisiae* and mouse ESC (vertical black dashed line) closely follow the best fit theoretical distribution, which is log-normal for *E. coli* and mouse ESC, and Burr or Log-logistic for *S. cerevisiae*.

**Figure S2: Transcriptome-wide noise.** Between 2 replicates at  $t = 0, 0.5, 1, 2, 5, 10$  min for *E. coli* (left panel),  $t = 0, 5, 10, 30, 60, 120, 180, 240$  min for *S. cerevisiae* (right panel), and between conditions (wild type, Mof KO, Control, ETO treated, ETO released) for mouse ESC, after removing lowly expressed genes (Fig. S1).

**Figure S3: Demonstration of dot size effect on determining DE genes.** Dot size of  $0.0125 \log_{10}(\text{TPM})$ , resulted in 482 DE genes (left panel), while dot size of  $0.004 \log_{10}(\text{TPM})$ , resulted in 1,194 DE genes (right panel) for *E. coli*, used as an example.

**Figure S4: Expression noise as an indicator of differential transcriptional mechanism in 3 pairwise combinations of *E. coli* data.** a) Expression noise between 2 replicates of *E. coli* at the same time point (first 6 bars from the left), and between anchor and target time points (the remaining 9 bars on the right) in 15 combinations of 3 replicates and 2 conditions. The  $r_*$  annotation denotes replicate name ( $r_1, r_2, r_3$ ), and the  $t_*$  annotation denotes time point, in which  $t = 0$  corresponds to time point 1 ( $t_1$ ) and  $t = 10$  minutes correspond to time point 2 ( $t_2$ ). b) Expression noise between anchor and target time points due to DE genes (filled circle) and non-DE genes (filled triangle) with scatter dot size ranging from 0.001 to 0.01  $\log_{10}(\text{TPM})$ . Scatter dot size at 0.004 resulted in non-DE gene set whose expression noise between anchor and target time points is comparable to the averaged whole-transcriptome noise between 2 replicates (dashed blue line) at all 3 pairs. There are 1,194 DE genes when using replicates 1 and 2 (left panel - this is the data shown in original manuscript), 1,191 DE genes with replicates 1 and 3 (middle panel), and 1,193 DE genes with replicates 2 and 3 (right panel).

**Figure S5: 2D Kernel density – based significance testing for ScatLay.** a) 2D Gaussian Kernel Density estimated from the between-replicate scatters of *E. coli* for any two conditions (as a representative for all data).  $P$ -value obtained for each gene through the integration of estimated density from  $-\text{Inf}$  to the between-condition scatter coordinate of that gene. b) Number of DE genes detected by ScatLay (green) at scatter dot size 0.004 (Fig. 2c), with KDE-based  $p$ -value cutoff at 0.05 (top panel), and 2-fold expression together with 0.05  $p$ -value cutoff (bottom panel), and DE genes detected by DESeq2 (dark yellow) and NOISeq (light purple) with expression fold change above 2 and adjusted  $p$ -value below 0.05 in *E. coli* (left panel), *S. cerevisiae* (middle panel), and mouse ESC (right panel).

**Figure S6: Screenshots from ScatLay desktop application.** Top-left panel: Reading gene expression matrix in either raw read count format, or normalized (such as TPM, RPKM or TMM units) format. Top-right panel: Pre-processing gene expression data, with expression normalization if raw read count was inputted, and removing lowly expressed genes. Bottom-left panel: Overlaying between-condition and between-replicate scatter plots. User change scatter dot size and  $p$ -value threshold to adjust specificity of DE genes. The non-overlapping genes with  $p$ -value satisfying threshold level are highlighted in green at the bottom right scatter. Bottom-right panel: List of DE genes with their associating  $p$ -value. User can download this set of gene as comma separated values (.csv) file.

# E.coli

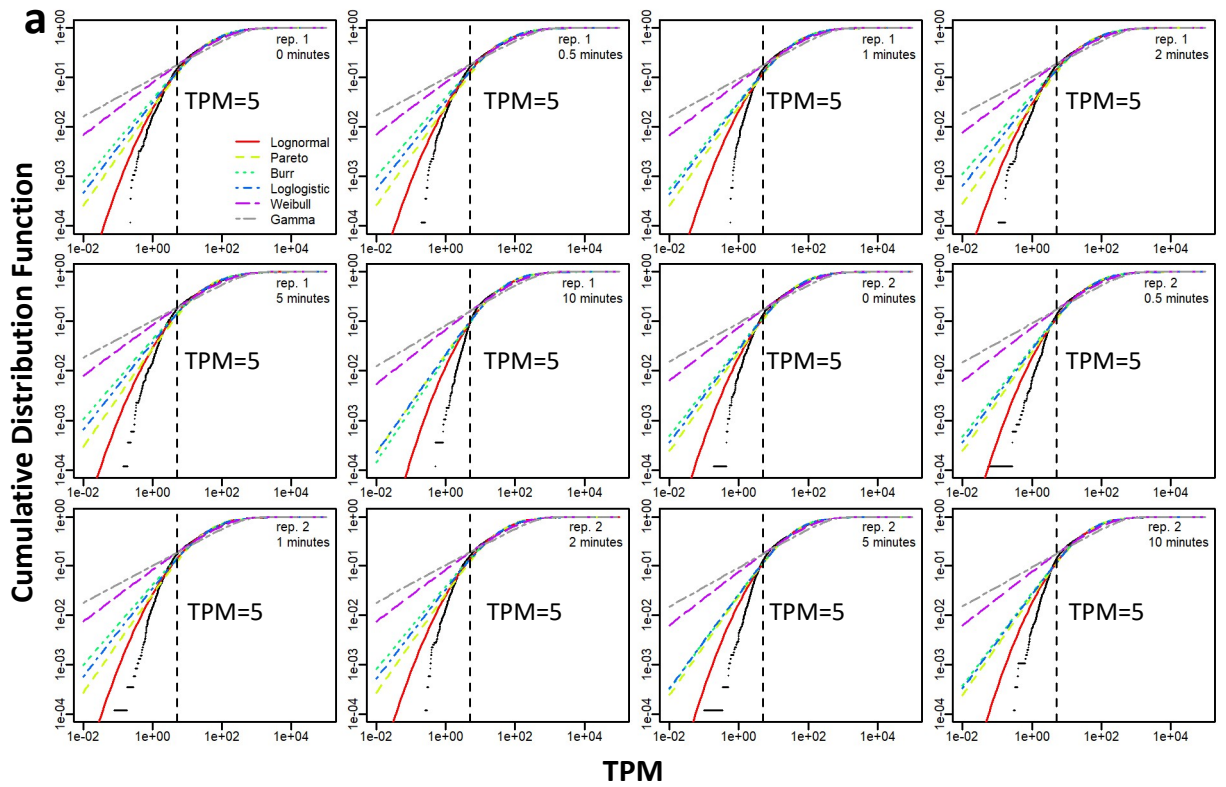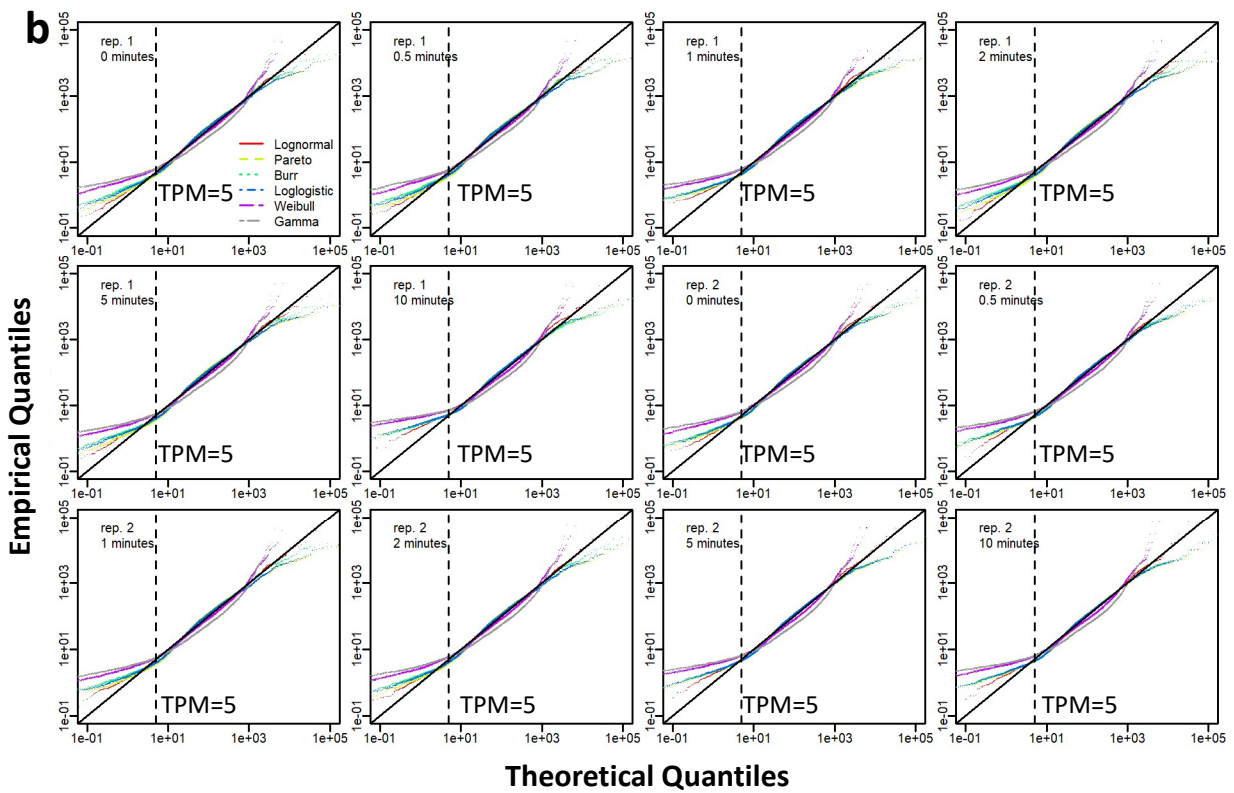

Figure S1

# Yeast

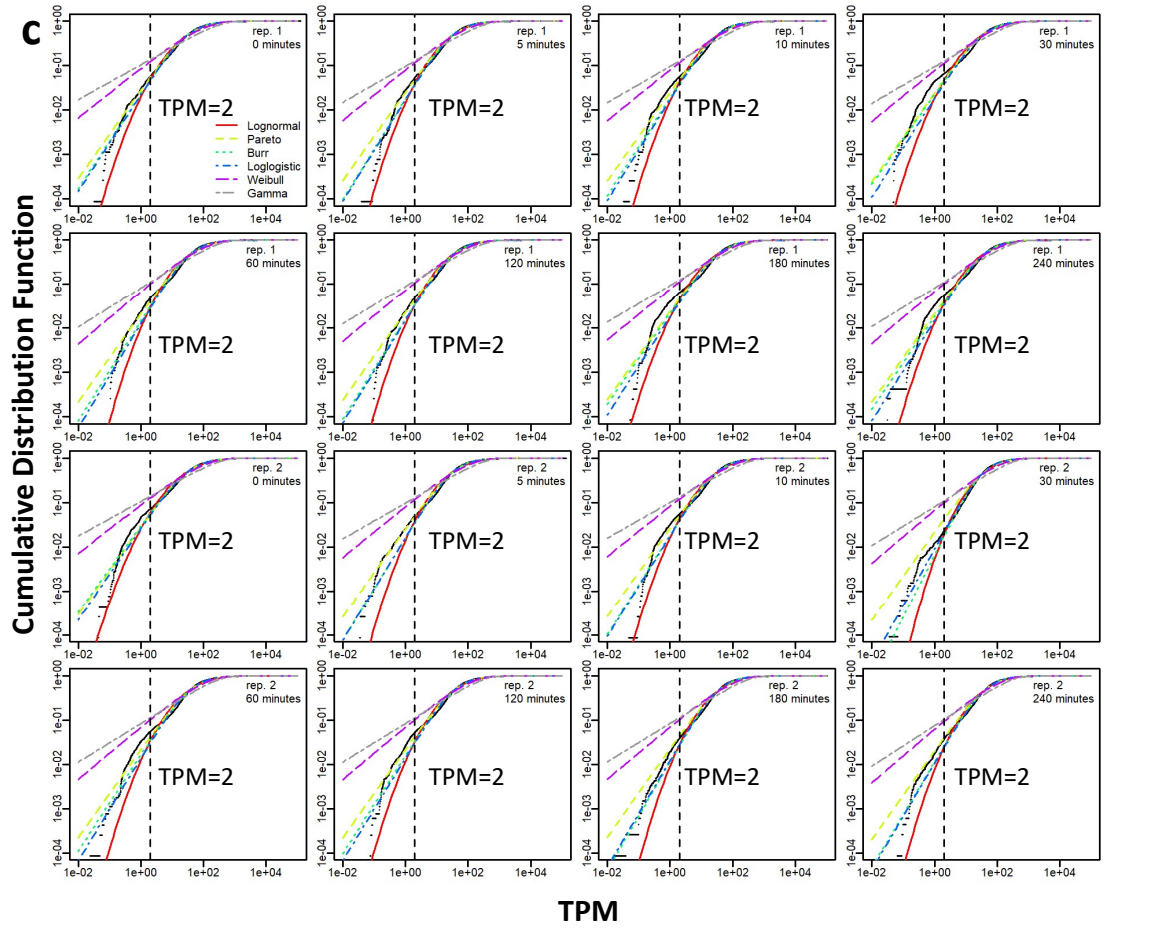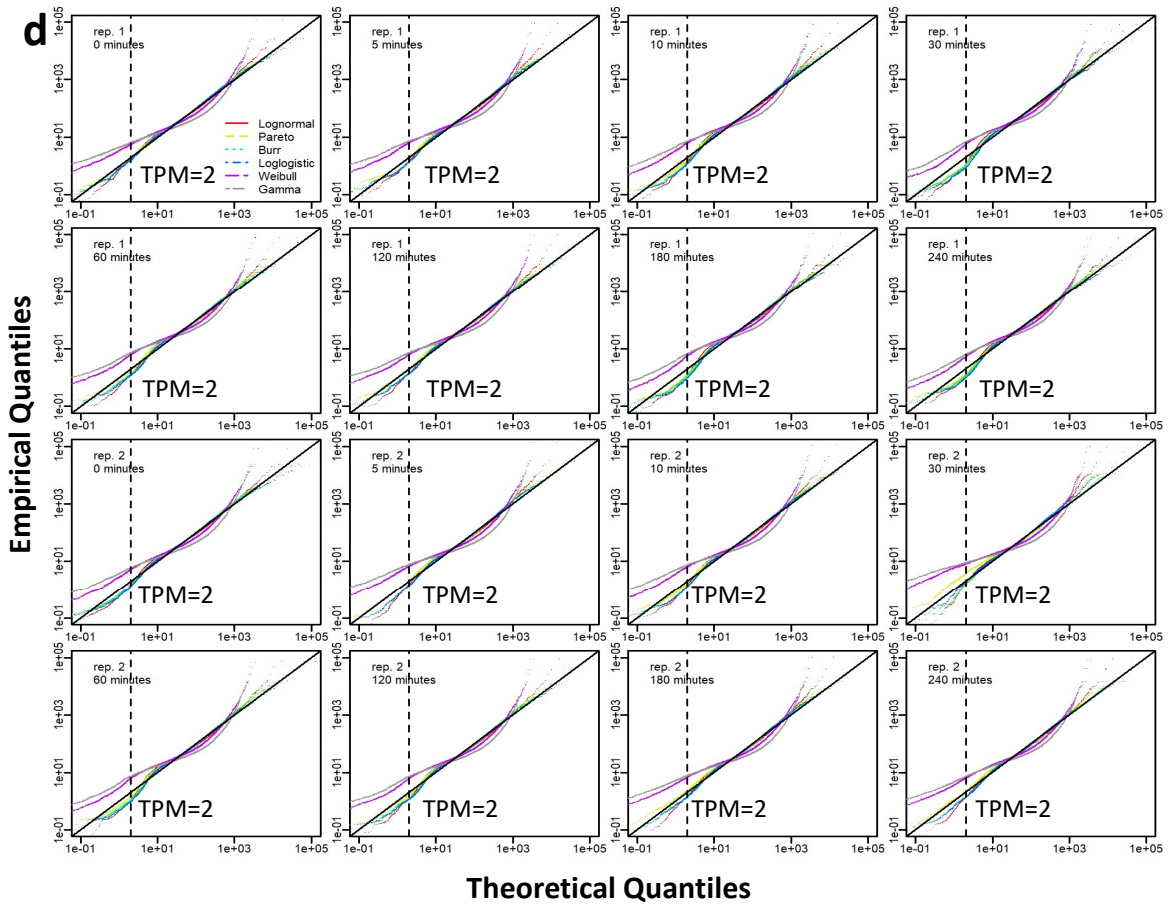

Figure S1 cont.

# Mouse

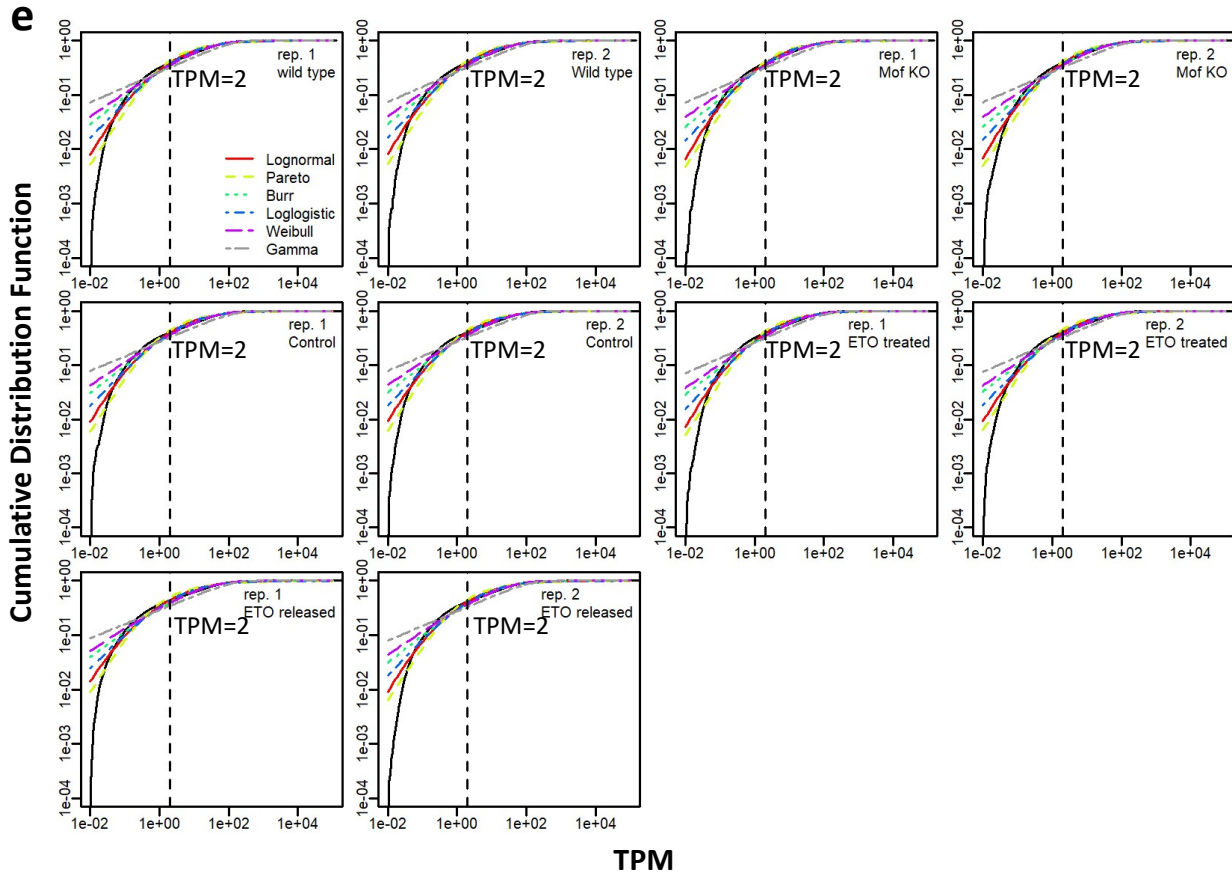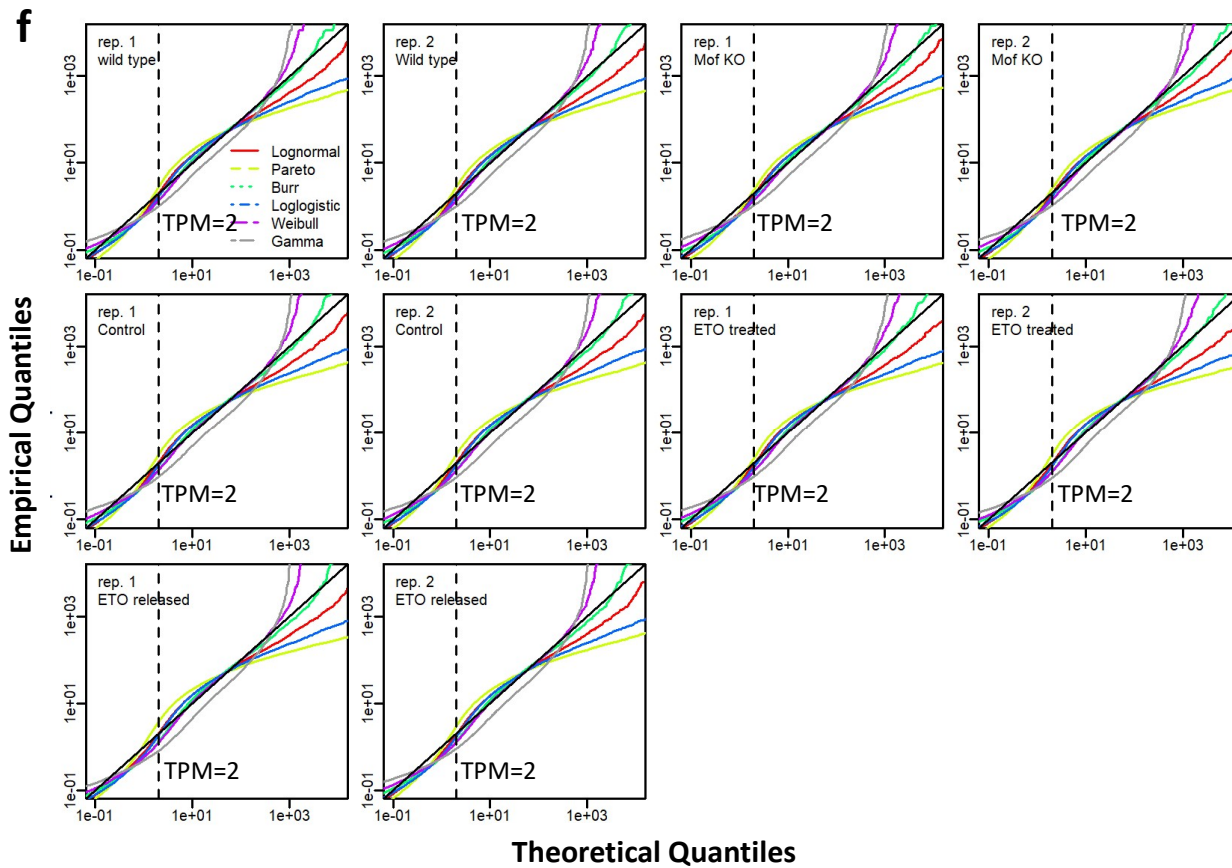

Figure S1 cont.

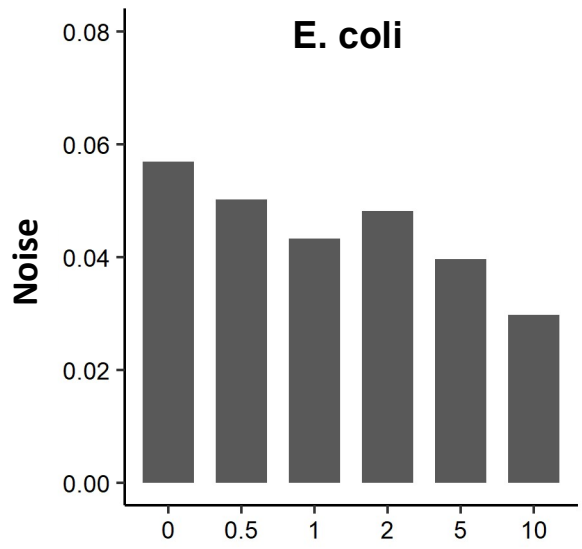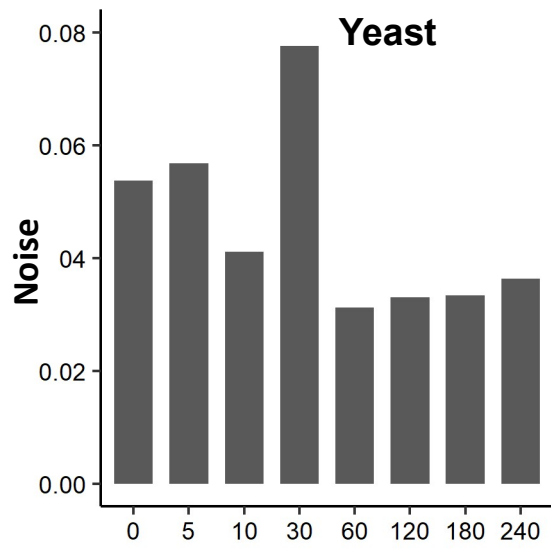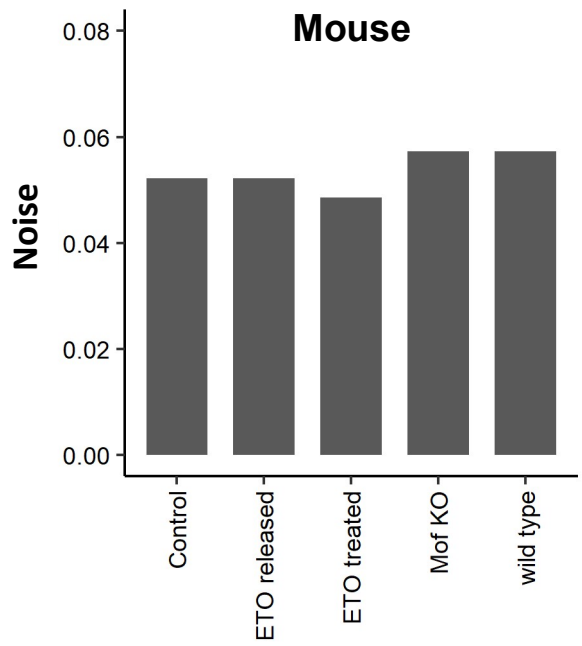

**Figure S2**



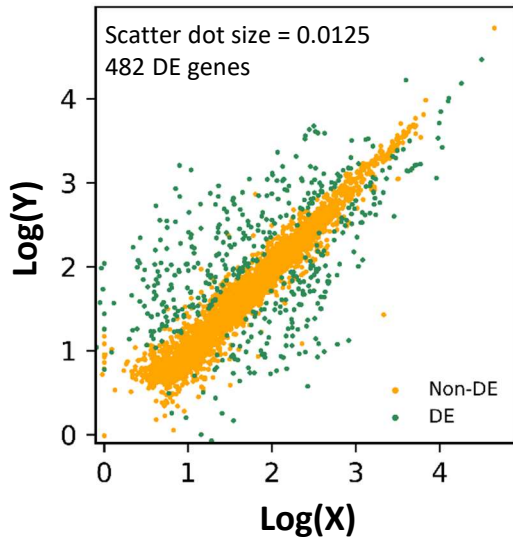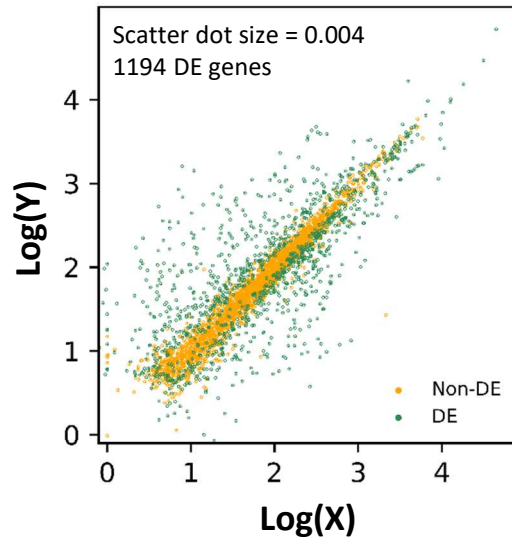

**Figure S3**

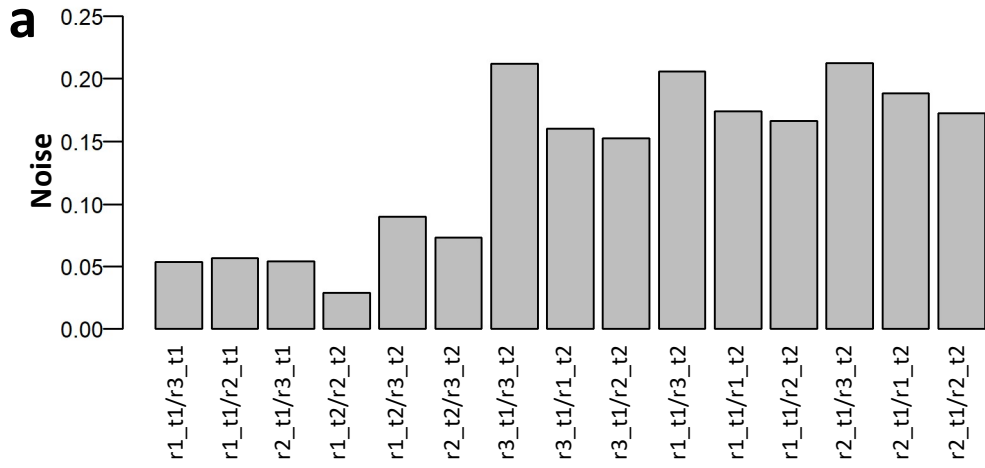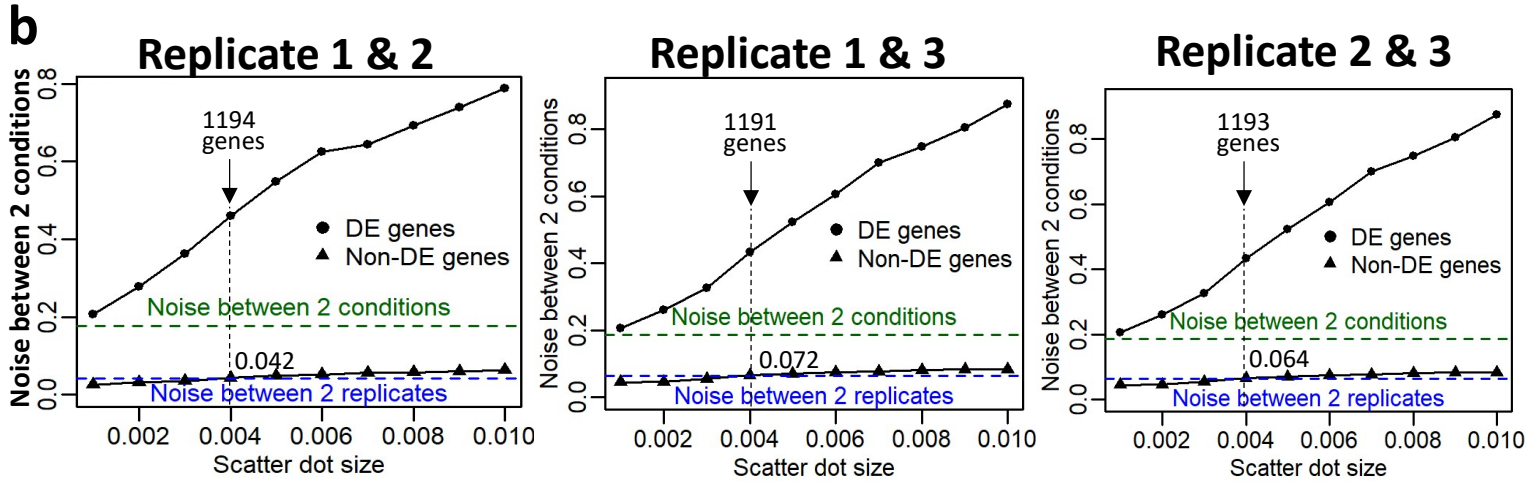

**Figure S4**



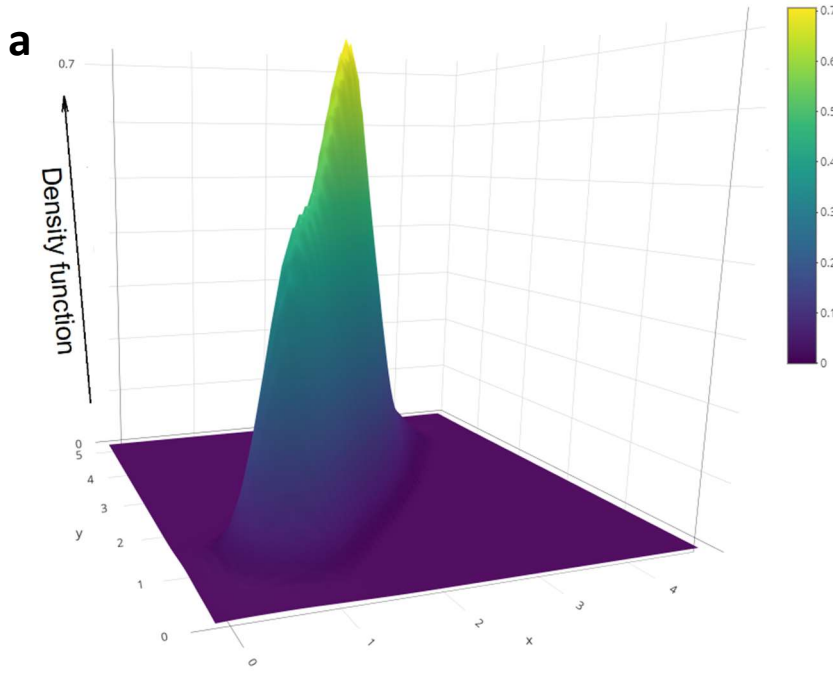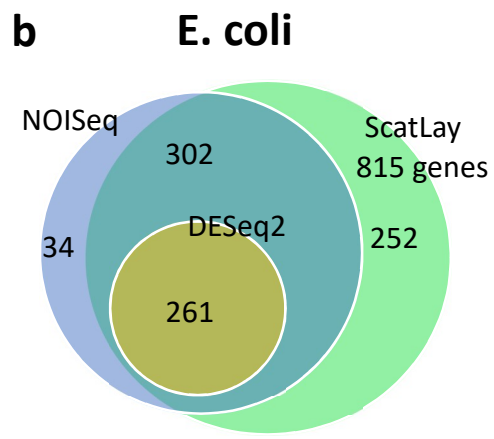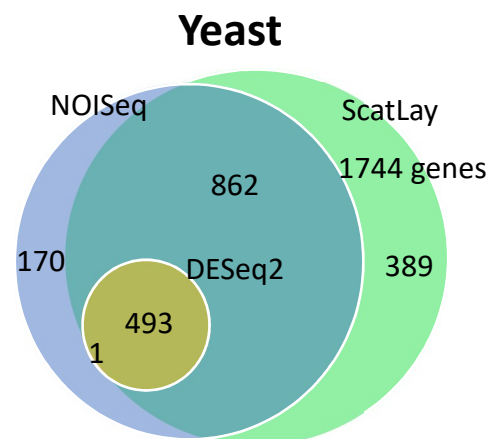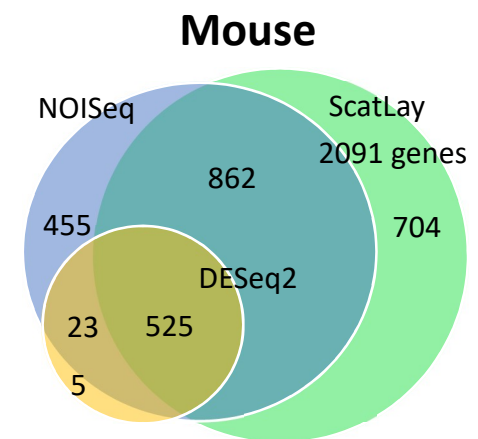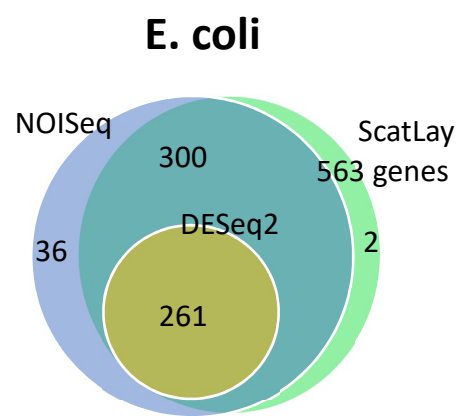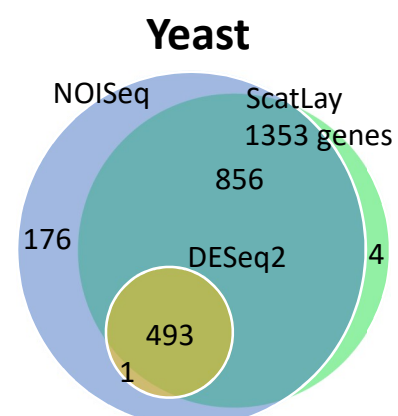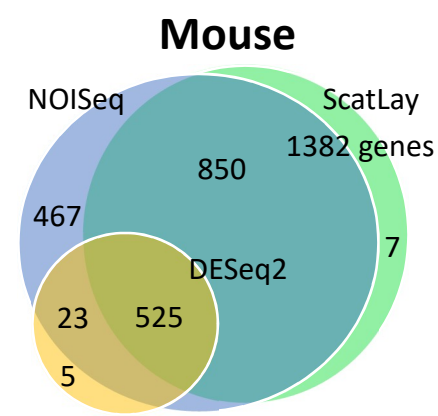

**Figure S5**

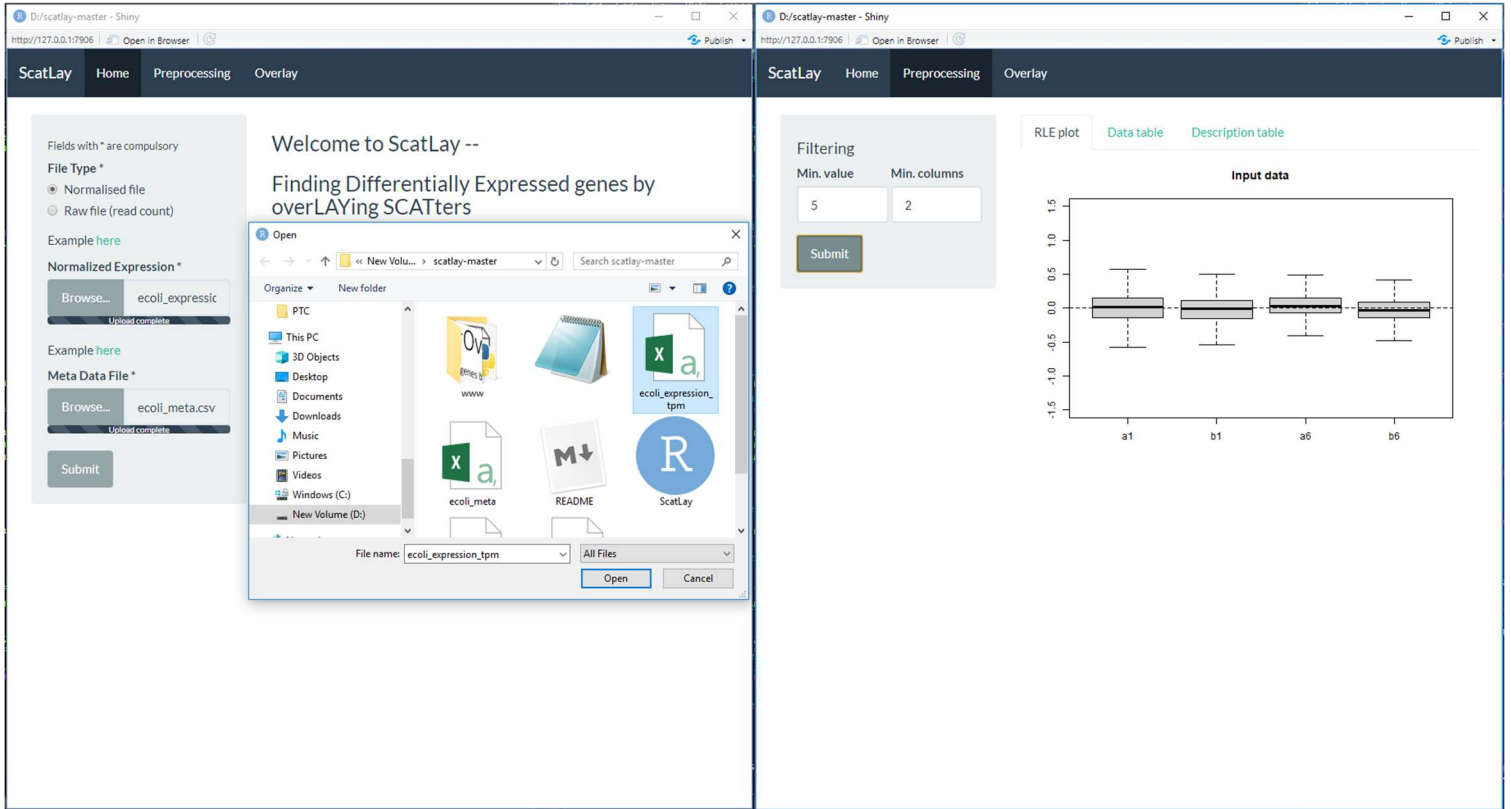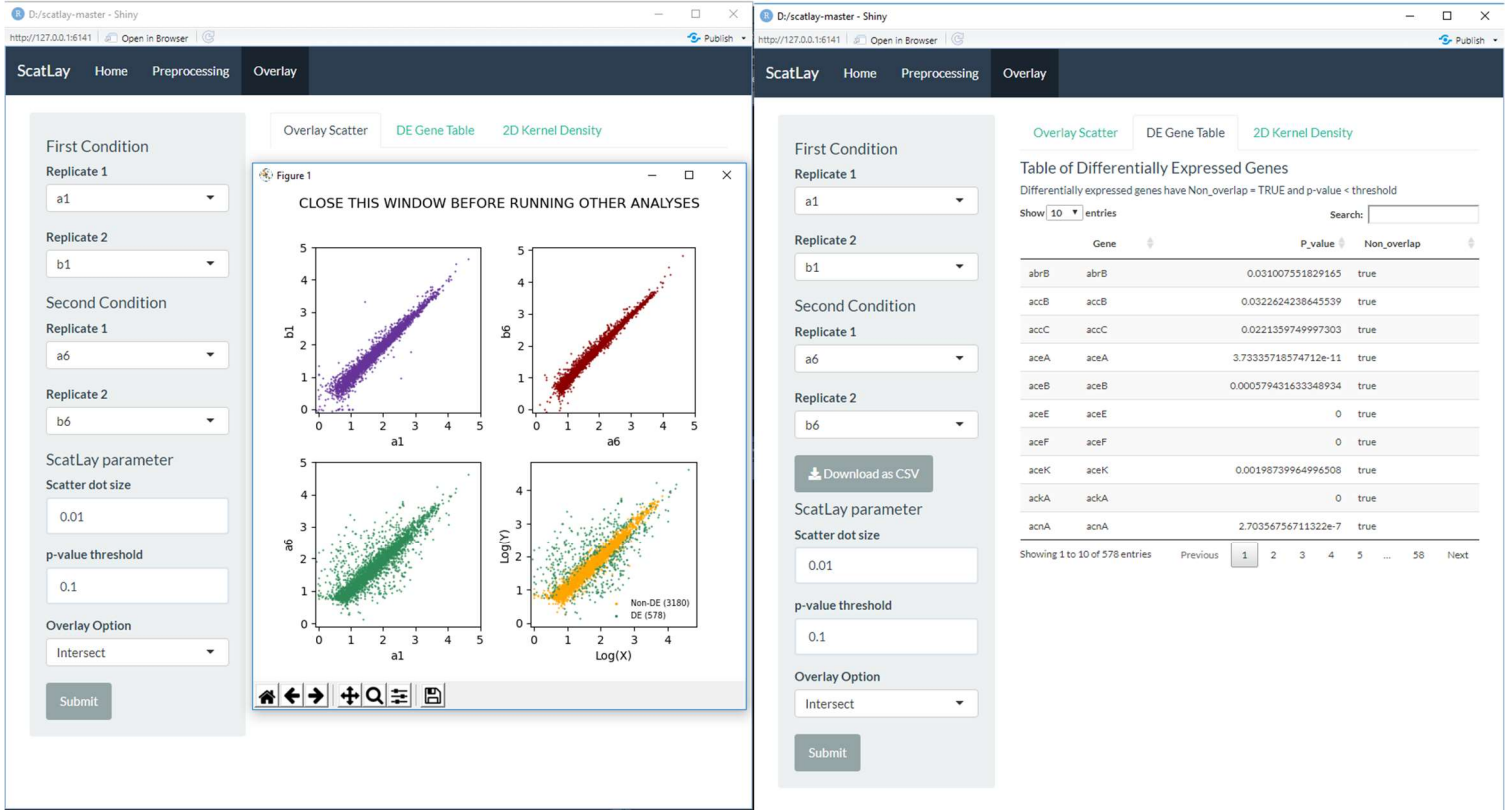

Figure S6

## Supplemental table legend

**Table S1: Akaike's information criterion showing the best fitted statistical distribution to the transcriptome-wide expression of *E. coli*, *S. cerevisiae* and mouse ESC data.**

**Table S2: Number of DE genes detected in each pair of replicates in *E. coli* data** (namely 1 and 2, 1 and 3, 2 and 3) by ScatLay at optimal scatter dots size (0.004), by DESeq2 with fold-change  $\geq 2$  and p-value  $< 0.05$ , and by NOISeq with fold-change  $\geq 2$  and p-value  $< 0.05$ .

**Table S3: Enriched biological processes of DE genes detected by ScatLay with  $p$ -value  $< 0.05$  for *E. coli* (815 genes), *S. cerevisiae* (1744 genes), and mouse ESC (2091 genes) data at scatter dot size  $0.004 \log_{10}(\text{TPM})$ .** The number of uniquely mapped gene IDs are 769, 1535 and 1802 genes for *E. coli*, Yeast, and Mouse respectively. Enrichment analysis was retrieved from Gene Ontology Consortium with defaulted over-representation test parameters.

**Table S4: Nine enriched biological processes of DE genes detected by NOISeq but not picked up by ScatLay (478 NOISeq genes) in mouse ESC data.** The number uniquely mapped gene is 345 genes. Enrichment analysis were retrieved from Gene Ontology Consortium with defaulted over-representation test parameters

**Table S5: Enriched biological processes of DE genes specifically detected by ScatLay with  $p$ -value  $< 0.05$  for *E. coli* (252 genes), *S. cerevisiae* (389 genes), and mouse ESC (704 genes) data.** The number of uniquely mapped gene IDs are 232, 363 and 520 genes for *E. coli*, Yeast, and Mouse respectively. Enrichment analysis was retrieved from Gene Ontology Consortium with defaulted over-representation test parameters.

**Table S1***E. coli*

| Time<br>(minute) | Replicate | Lognormal | Pareto   | Burr     | Loglogistic | Weibull  | Gamma    | min_AIC   |
|------------------|-----------|-----------|----------|----------|-------------|----------|----------|-----------|
| 0                | Rep. 1    | 48642.39  | 48836.06 | 48789.4  | 48803.99    | 49292.29 | 50337.54 | Lognormal |
| 0.5              | Rep. 1    | 48491.43  | 48704.59 | 48633.85 | 48657.3     | 49097.76 | 50127.62 | Lognormal |
| 1                | Rep. 1    | 48841.43  | 49051.21 | 49033.92 | 49034.86    | 49603.09 | 50638.59 | Lognormal |
| 2                | Rep. 1    | 48526.78  | 48750.51 | 48671.86 | 48693.55    | 49125.86 | 50163.96 | Lognormal |
| 5                | Rep. 1    | 48473.24  | 48706.49 | 48642.12 | 48656.2     | 49117.31 | 50172.92 | Lognormal |
| 10               | Rep. 1    | 49269.51  | 49441.38 | 49439.1  | 49443.25    | 50215.4  | 51289.65 | Lognormal |
| 0                | Rep. 2    | 48257.48  | 48423.97 | 48409.13 | 48412.21    | 49017.74 | 50139.47 | Lognormal |
| 0.5              | Rep. 2    | 48983.88  | 49168.25 | 49156.31 | 49157.84    | 49753.5  | 50846.05 | Lognormal |
| 1                | Rep. 2    | 48741.22  | 48971.46 | 48909.27 | 48926.51    | 49384.77 | 50424.94 | Lognormal |
| 2                | Rep. 2    | 48488.08  | 48693.12 | 48650.92 | 48661.23    | 49186.1  | 50327.67 | Lognormal |
| 5                | Rep. 2    | 48799.45  | 48976.71 | 48976.61 | 48974.65    | 49636.51 | 50734.56 | Lognormal |
| 10               | Rep. 2    | 48829.55  | 49006.02 | 49002    | 49000.89    | 49646.14 | 50797.74 | Lognormal |

*S. cerevisiae*

| Time<br>(minute) | Replicate | Lognormal | Pareto   | Burr     | Loglogistic | Weibull  | Gamma    | min_AIC     |
|------------------|-----------|-----------|----------|----------|-------------|----------|----------|-------------|
| 0                | Rep. 1    | 62251.87  | 62046.32 | 6203.294 | 62034.3     | 63465.49 | 65685.38 | Burr        |
| 5                | Rep. 1    | 62872.81  | 62632.09 | 62590.54 | 62591.02    | 64205.38 | 66426.87 | Burr        |
| 10               | Rep. 1    | 63624     | 63291.17 | 63265.71 | 63268.08    | 64822.66 | 67008.98 | Burr        |
| 30               | Rep. 1    | 65175.98  | 64741.05 | 64740.89 | 64778.81    | 66052.07 | 68147.86 | Burr        |
| 60               | Rep. 1    | 64851     | 64549.36 | 64509.83 | 64516.01    | 66002.93 | 67995.11 | Burr        |
| 120              | Rep. 1    | 64092.4   | 63844.22 | 63804.8  | 63804.95    | 65340.85 | 67466.85 | Burr        |
| 180              | Rep. 1    | 65258.36  | 64864.59 | 64863.5  | 64888.5     | 66187.8  | 68272.38 | Burr        |
| 240              | Rep. 1    | 65705.9   | 65356.69 | 65351.85 | 65377.61    | 66621.55 | 68445.76 | Burr        |
| 0                | Rep. 2    | 63616.34  | 63370.84 | 63370.80 | 63385.55    | 64591.03 | 66599.47 | Burr        |
| 5                | Rep. 2    | 62749.62  | 62443.72 | 62381.8  | 62379.8     | 64098.16 | 66455.41 | Loglogistic |
| 10               | Rep. 2    | 62819.05  | 62523.05 | 62485.55 | 62484.28    | 64112.58 | 66440.08 | Loglogistic |
| 30               | Rep. 2    | 61554.74  | 61458    | 61197.6  | 61223.92    | 63293.81 | 65545.35 | Burr        |
| 60               | Rep. 2    | 65323.74  | 64937.24 | 64916.44 | 64931.27    | 66342.51 | 68302.57 | Burr        |
| 120              | Rep. 2    | 64800.66  | 64490.71 | 64462.45 | 64469.13    | 65906.13 | 67880.98 | Burr        |
| 180              | Rep. 2    | 63396.9   | 63183.05 | 63074.05 | 63074.83    | 64813.86 | 66926.02 | Burr        |
| 240              | Rep. 2    | 64329.56  | 64094.88 | 64019.77 | 64019.96    | 65561.05 | 67444.42 | Burr        |

*Mouse embryonic stem cell*

|            | Lognormal | Pareto   | Burr     | Loglogistic | Weibull  | Gamma    | min_AIC   |
|------------|-----------|----------|----------|-------------|----------|----------|-----------|
| WT.1       | 152626.1  | 156204.4 | 153044.6 | 154001.1    | 153550.6 | 159878.5 | Lognormal |
| WT.2       | 151632    | 155211.9 | 152058.6 | 153012.3    | 152577.2 | 159197.9 | Lognormal |
| Mof.KO.1   | 148181    | 151290.4 | 148757.1 | 149472.1    | 149436.7 | 156196.7 | Lognormal |
| Mof.KO.2   | 148297.5  | 151459.9 | 148848.6 | 149587.8    | 149515.2 | 156301.1 | Lognormal |
| Control.1  | 146187    | 149672.5 | 146711.8 | 147591.7    | 147239.9 | 154345.1 | Lognormal |
| Control.2  | 147299.4  | 150802.5 | 147865.7 | 148725.7    | 148395.9 | 155388.8 | Lognormal |
| ETO.1      | 157486.4  | 161122.5 | 157942.1 | 158998.1    | 158364.6 | 165125.3 | Lognormal |
| ETO.2      | 158984.3  | 162839.1 | 159541.6 | 160624.5    | 159907.1 | 166697.2 | Lognormal |
| Released.1 | 153600.9  | 157415   | 154453.4 | 155286.8    | 154914.3 | 162128.2 | Lognormal |
| Released.2 | 151166.8  | 154591   | 151911.3 | 152690.2    | 152481.1 | 159772.6 | Lognormal |



**Table S2**

|                  | ScatLay | DESeq2 | NOISeq |
|------------------|---------|--------|--------|
| Replicates 1 & 2 | 1194    | 261    | 597    |
| Replicates 1 & 3 | 1191    | 239    | 530    |
| Replicates 2 & 3 | 1193    | 262    | 627    |
| Variability      | 0.25%   | 9.6%   | 18.1%  |

**Table S4**

| GO biological process complete                                 | Reference (22265) | Mouse ESC (345) | Mouse ESC (expected) | Over/under | Fold enrichment | Raw P-value | FDR      |
|----------------------------------------------------------------|-------------------|-----------------|----------------------|------------|-----------------|-------------|----------|
| phosphorus metabolic process (GO:0006793)                      | 1713              | 51              | 26.54                | +          | 1.92            | 1.01E-05    | 1.46E-02 |
| phosphate-containing compound metabolic process (GO:0006796)   | 1691              | 50              | 26.2                 | +          | 1.91            | 1.47E-05    | 1.93E-02 |
| negative regulation of cellular metabolic process (GO:0031324) | 2500              | 71              | 38.74                | +          | 1.83            | 7.90E-07    | 1.78E-03 |
| regulation of signal transduction (GO:0009966)                 | 2856              | 73              | 44.25                | +          | 1.65            | 2.24E-05    | 2.53E-02 |
| negative regulation of cellular process (GO:0048523)           | 4747              | 117             | 73.56                | +          | 1.59            | 9.76E-08    | 5.14E-04 |
| negative regulation of biological process (GO:0048519)         | 5213              | 122             | 80.78                | +          | 1.51            | 7.26E-07    | 1.91E-03 |
| regulation of response to stimulus (GO:0048583)                | 3997              | 92              | 61.93                | +          | 1.49            | 7.22E-05    | 4.57E-02 |
| positive regulation of cellular process (GO:0048522)           | 5722              | 124             | 88.66                | +          | 1.4             | 3.07E-05    | 2.85E-02 |
| regulation of cellular process (GO:0050794)                    | 11169             | 211             | 173.07               | +          | 1.22            | 5.60E-05    | 4.02E-02 |
